# Supplementary material for: Sex-Differences and Temporal Consistency in Stickleback Fish Boldness
Source: PLoS One. 2013 Dec 4;8(12):e81116. doi: 10.1371/journal.pone.0081116 (PMC3852232; doi:10.1371/journal.pone.0081116)
Supplement: File S1 — Supporting Information. All data used in our statistical analyses and to produce the figures in the manuscript are labelled as follows: Fig 2A (main figure); Fig 2A (inset figure); Fig 2B (main figure); Fig 2B (inset figure); Fig 3A (main figure); Fig 3A (inset figure); Fig 3B; Fig 4. (XLSX) [file pone.0081116.s001.xlsx]

## Sheet: Fig2A(main)
PropTimeOut_DAY3	PropTimeOut_DAY4
0.5	0.313345
0.309314	0.00324813
0.36172	0.339909
0.057533	0.0671812
0.468527	0.844546
0.107092	0.13701
0.585588	0.253701
0.046995	0
0.440046	0.458449
0.524922	0.826367
0.310738	0.330435
0.504984	0.350844
0.123042	0.214208
0.300769	0.197094
0.448875	0.102211
0.095699	0.033795
0	0.1172
0.111934	0.0306765
0.167474	0.102707
0.233837	0.100754
0.161492	0.0496614
0.328112	0.0663093
0.534606	0.32454
0.111934	0.180819
0.187981	0.0635053
0.003418	0
0.235545	0.160501
0.067502	0.0150191
0.090003	0.109141
0.131017	0.0624309
0.091997	0.261667
0.092851	0.190278
0.07149	0.117581

## Sheet: Fig2A(inset)
PropTimeOut_DAY3	PropTimeOut_DAY4
0.500142	0.313345
0.309314	0.00324813
0.36172	0.339909
0.057533	0.0671812
0.468527	0.844546
0.222159	0.0532494
0.107092	0.13701
0.585588	0.253701
0.046995	0
0.440046	0.458449
0.524922	0.826367
0.310738	0.330435
0.504984	0.350844
0.123042	0.214208
0.300769	0.197094
0.042723	0.115406
0.448875	0.102211
0.095699	0.033795
0	0.1172
0.111934	0.0306765
0.167474	0.102707
0.233837	0.100754
0.161492	0.0496614
0.328112	0.0663093
0.534606	0.32454
0.111934	0.180819
0.187981	0.0635053
0.076047	0.0735859
0.048134	0
0.003418	0
0.235545	0.160501
0.384221	0.0725313
0.073199	0.149645
0.067502	0.0150191
0.046141	0.0752837
0	0.0655965
0.096839	0.0822715
0.090003	0.109141
0.031615	0.0512397
0.14127	0.306887
0.084022	0.0671271
0.131017	0.0624309
0.091997	0.261667
0.050698	0.229722
0.092851	0.190278
0.048419	0.154444
0.07149	0.117581
0.020792	0.0805238

## Sheet: Fig2B (main)
Ave_PropTimeOut	catch#1
0.406743	1
0.156281	2
0.350814	3
0.0623571	4
0.656537	5
0.122051	7
0.419645	8
0.0234975	9
0.449247	10
0.675645	11
0.320586	12
0.427914	13
0.168625	14
0.248932	15
0.275543	17
0.064747	18
0.1172	19
0.0713052	20
0.135091	21
0.167295	22
0.105577	23
0.197211	24
0.429573	25
0.146376	26
0.125743	27
0.003418	30
0.198023	31
0.0412606	34
0.0995721	38
0.096724	42
0.176832	43
0.141564	45
0.0945358	47

## Sheet: Fig2B (inset)
Ave_PropTimeOut	catch#1
0.406743	1
0.156281	2
0.350814	3
0.0623571	4
0.656537	5
0.137704	6
0.122051	7
0.419645	8
0.0234975	9
0.449247	10
0.675645	11
0.320586	12
0.427914	13
0.168625	14
0.248932	15
0.0790644	16
0.275543	17
0.064747	18
0.1172	19
0.0713052	20
0.135091	21
0.167295	22
0.105577	23
0.197211	24
0.429573	25
0.146376	26
0.125743	27
0.0748165	28
0.048134	29
0.003418	30
0.198023	31
0.228376	32
0.111422	33
0.0412606	34
0.0607123	35
0.0655965	36
0.0895552	37
0.0995721	38
0.0414273	39
0.224079	40
0.0755745	41
0.096724	42
0.176832	43
0.14021	44
0.141564	45
0.101432	46
0.0945358	47
0.0506579	48

## Sheet: Fig3A (main)
Ave_PropTimeOut	Sex
0.406743	M
0.156281	F
0.350814	F
0.0623571	M
0.656537	M
0.122051	F
0.419645	M
0.0234975	F
0.449247	M
0.675645	M
0.320586	F
0.427914	F
0.168625	M
0.248932	F
0.275543	M
0.064747	F
0.1172	F
0.0713052	F
0.135091	F
0.167295	F
0.105577	M
0.197211	M
0.429573	F
0.146376	F
0.125743	F
0.003418	F
0.198023	F
0.0412606	F
0.0995721	F
0.096724	F
0.176832	F
0.141564	F
0.0945358	F

## Sheet: Fig3A (inset)
Ave_PropTimeOut	Sex
0.406743	M
0.156281	F
0.350814	F
0.0623571	M
0.656537	M
0.137704	M
0.122051	F
0.419645	M
0.0234975	F
0.449247	M
0.675645	M
0.320586	F
0.427914	F
0.168625	M
0.248932	F
0.0790644	M
0.275543	M
0.064747	F
0.1172	F
0.0713052	F
0.135091	F
0.167295	F
0.105577	M
0.197211	M
0.429573	F
0.146376	F
0.125743	F
0.0748165	F
0.048134	M
0.003418	F
0.198023	F
0.228376	M
0.111422	M
0.0412606	F
0.0607123	F
0.0655965	F
0.0895552	F
0.0995721	F
0.0414273	M
0.224079	M
0.0755745	F
0.096724	F
0.176832	F
0.14021	M
0.141564	F
0.101432	F
0.0945358	F
0.0506579	F

## Sheet: Fig3B
Sex	catch#1
M	1
F	2
F	3
M	4
M	5
M	6
F	7
M	8
F	9
M	10
M	11
F	12
F	13
M	14
F	15
M	16
M	17
F	18
F	19
F	20
F	21
F	22
M	23
M	24
F	25
F	26
F	27
F	28
M	29
F	30
F	31
M	32
M	33
F	34
F	35
F	36
F	37
F	38
M	39
M	40
F	41
F	42
F	43
M	44
F	45
F	46
F	47
F	48

## Sheet: Fig4
catch#1	catch#2
5	1
1	2
9	3
10	4
2	5
15	6
30	7
16	8
8	9
17	10
3	11
18	12
11	13
26	14
25	15
21	16
20	17
19	18
4	19
12	20
6	21
7	22
23	23
14	24
28	25
24	26
13	27
22	28
27	29
29	30
